# Supplementary material for: Matrix metalloproteinases and tissue damage in HIV-tuberculosis immune reconstitution inflammatory syndrome
Source: PubMed Central journal article supplement (PMC3992843; doi:10.1002/eji.201343593), 2013-10-30
Supplement: eji0044-0127-sd1.pdf [file eji0044-0127-sd1.pdf]

# European Journal of Immunology

**Supporting Information**

**for**

**DOI 10.1002/eji.201343593**

Rebecca Tadokera, Graeme A. Meintjes, Katalin A. Wilkinson,  
Keira H. Skolimowska, Naomi Walker, Jon S. Friedland, Gary Maartens,  
Paul T. G. Elkington and Robert J. Wilkinson

**Matrix metalloproteinases and tissue damage  
in HIV-tuberculosis immune reconstitution  
inflammatory syndrome**

## Supporting Table 1

### Baseline characteristics of TB-IRIS patients and comparator non-IRIS group

|                                           | TB-IRIS             | Non-IRIS               | p-value |
|-------------------------------------------|---------------------|------------------------|---------|
| n                                         | 22                  | 22                     | NA      |
| Median age (Years, IQR)                   | 31<br>(23.2 - 52.7) | 35.75<br>(22.2 - 54.1) | 0.11    |
| Female n (%)                              | 68                  | 68                     | 0.99    |
| Baseline CD4 / $\mu$ l, IQR               | 62<br>(14.0 -193.0) | 42.5<br>(5.0 – 302.0)  | 0.17    |
| Median days of TB treatment prior to cART | 56<br>(13.0 -186.0) | 75.5<br>(29.0 -173.0)  | 0.06    |
| Median days of cART to IRIS or to sample  | 14<br>(5.0 -78.0)   | 14<br>(14 - 14)        | 0.94    |
| Previous TB?                              | 8 (36)              | 3 (14)                 | 0.16    |
| TB disease form n (%)                     |                     |                        |         |
| Pulmonary or pleural                      | 12 (55)             | 17 (77)                | 0.06    |
| Disseminated                              | 7 (32)              | 4 (18)                 | 0.51    |
| Pericardial                               | 1 (4)               | -                      |         |
| Lymphadenopathic                          | 2 (14)              | 1 (4)                  | 0.43    |
| Smear or culture confirmed?               | 19 (86)             | 13 (59)                | 0.045   |

**Supporting Table 2: Baseline characteristics of RCT TB-IRIS patients**

|                                           | Prednisone treated | Placebo treated | p-value |
|-------------------------------------------|--------------------|-----------------|---------|
| n                                         | 16                 | 12              | NA      |
| Female n (%)                              | 10 (63)            | 5 (42)          | 0.45    |
| Baseline CD4/ $\mu$ L                     | 48<br>[13-181]     | 68.5<br>[5-156] | 0.67    |
| Median days of TB treatment prior to cART | 67<br>[22-180]     | 30<br>[13-115]  | 0.04    |
| Median days of cART to IRIS onset         | 14<br>[5-23]       | 7<br>[3-32]     | 0.08    |
| Previous TB? (%)                          | 3 (19)             | 2 (17)          | 1.00    |
| Basis of TB Diagnosis                     |                    |                 |         |
| Culture confirmed                         | 9                  | 8               | 0.71    |
| Smear only                                | 4                  | 2               | 0.67    |
| Empiric                                   | 3                  | 2               | 1.00    |
| TB Disease Form                           |                    |                 |         |
| Pulmonary only                            | 9                  | 4               | 0.28    |
| Extrapulmonary                            | 7                  | 8               | 0.44    |
| IRIS manifestation n (%)                  |                    |                 |         |
| New Lymph nodes                           | 6 (38)             | 3 (25)          | 0.69    |
| New Abscess                               | 0                  | 0               | -       |
| New Pulmonary Infiltrates                 | 3 (19)             | 3 (25)          | 1.00    |
| New Effusions                             | 1 (6)              | 3 (25)          | 0.29    |
| Recurrent Symptoms                        | 16 (100)           | 12(100)         | 1.00    |
